# Supplementary material for: A new method for treating chronic pancreatitis and preventing fibrosis using bioactive calcium silicate ion solution
Source: Royal Society of Chemistry journal article supplement (doi:10.1039/d3tb01287e), 2023-01-01
Supplement: d3tb01287e1.pdf [file d3tb01287e1.pdf]

### Supporting Information

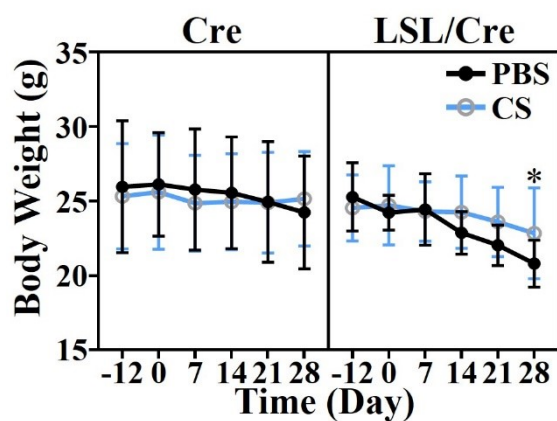

Figure S1. Changes of body weight in Cre and LSL/Cre chronic pancreatitis mice treated with CS ion solution.

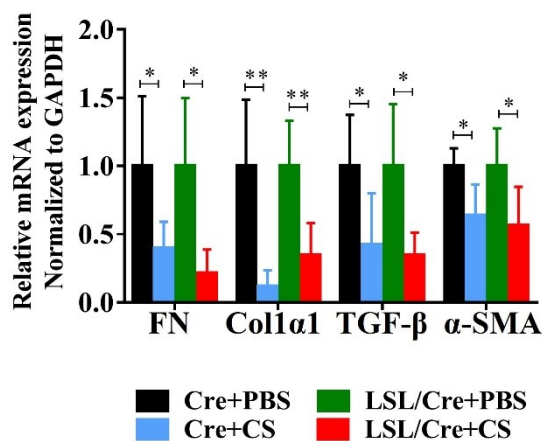

Figure S2. The effect of CS ion solution on the expression level of fibrosis related gene (Fibronectin (FN), Col1a1, TGF- $\beta$ ,  $\alpha$ -SMA) in pancreatic tissue after treated with CS ion solution for 1 month. (\* $p < 0.05$  compared with PBS group; \*\*  $p < 0.01$  compared with PBS group;  $n = 5$ ).

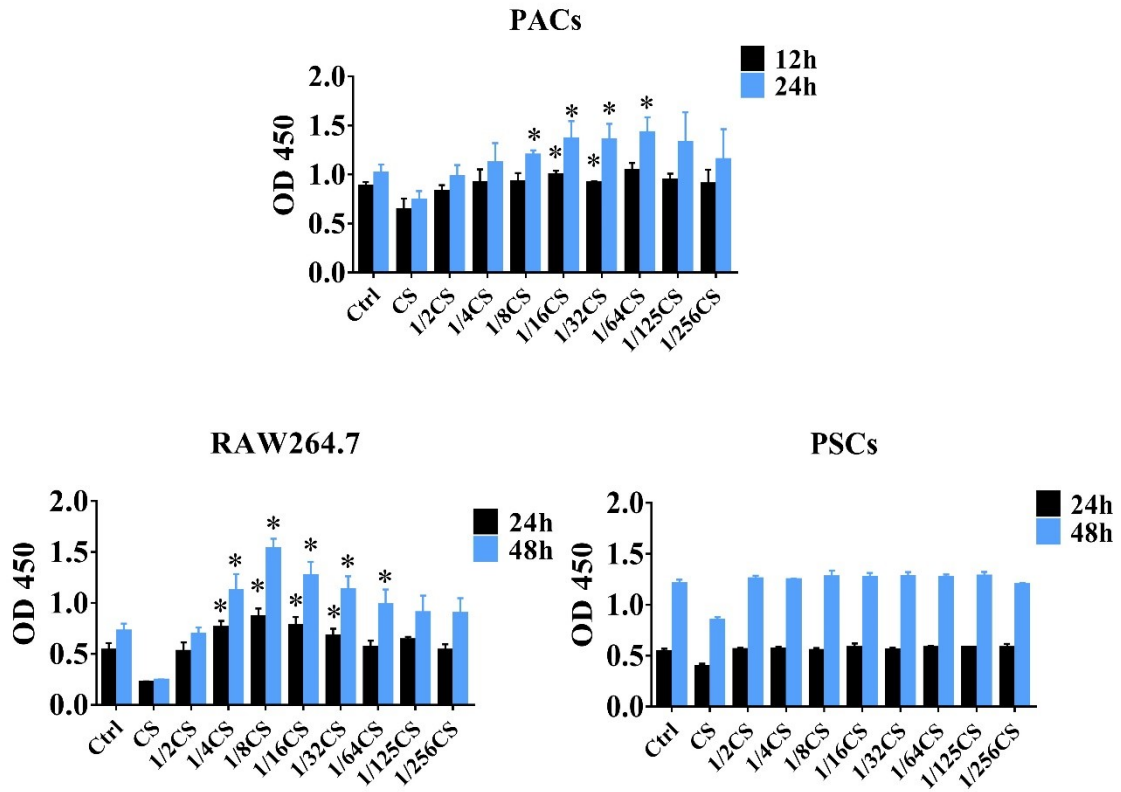

Figure S3. Effects of different concentrations of CS ion solution on the cell viability of pancreatic acinar cells (PACs), macrophages (Raw.264.7) and pancreatic stellate cells (PSCs). (\*p<0.05 compared with Ctrl group; n=5).

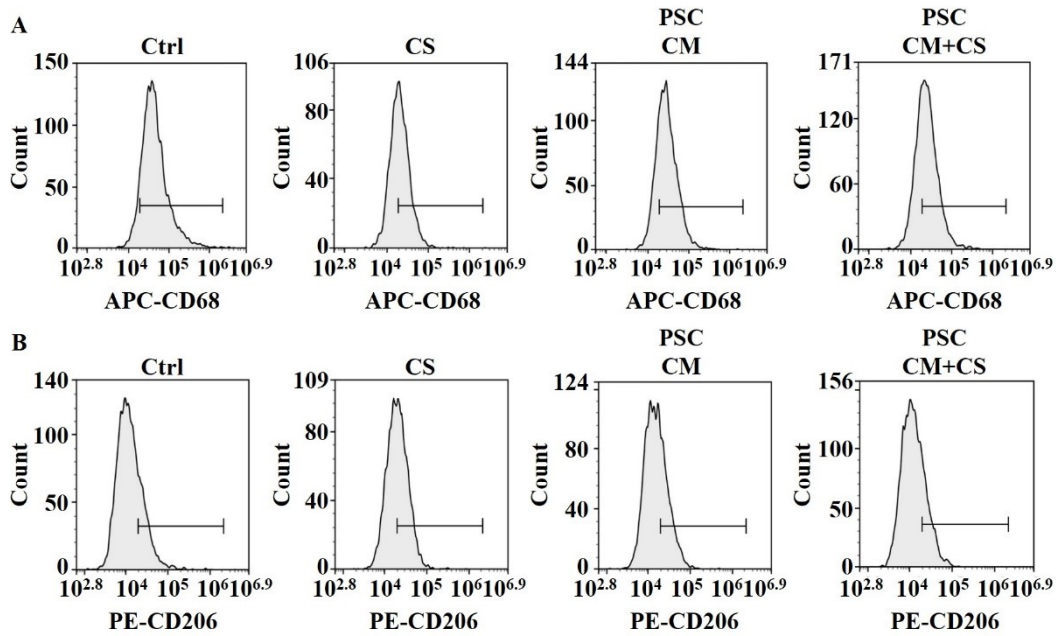

Figure S4. The expression of CD68 and CD206 markers on the macrophage surface detected by flow cytometry.

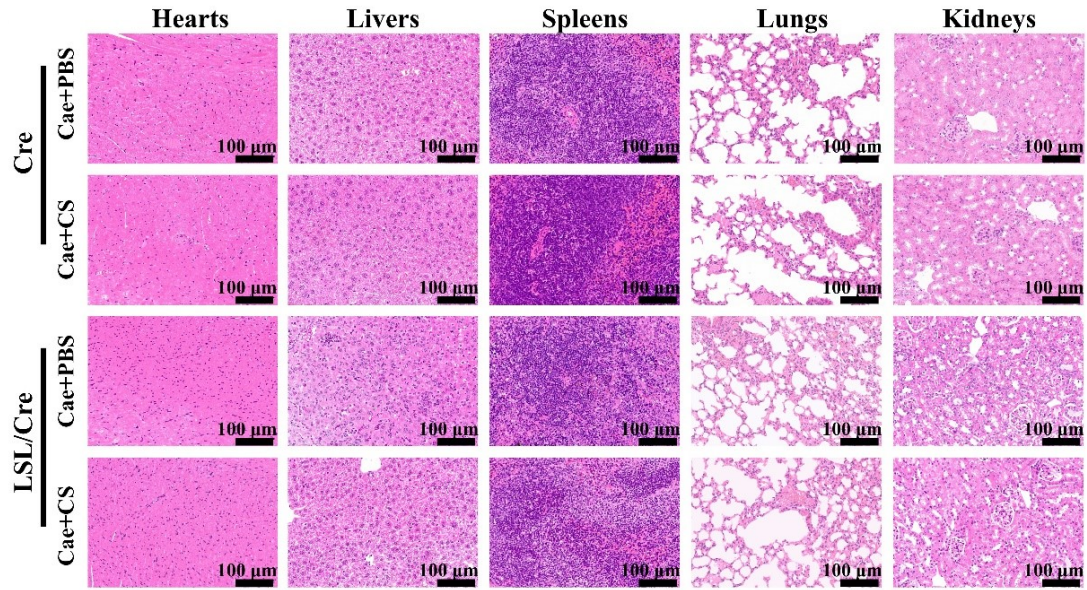

Figure S5. Representative images of H&E staining of tissue (heart, liver, spleen, lung, and kidney) after treated with CS ion solution for 1 month.

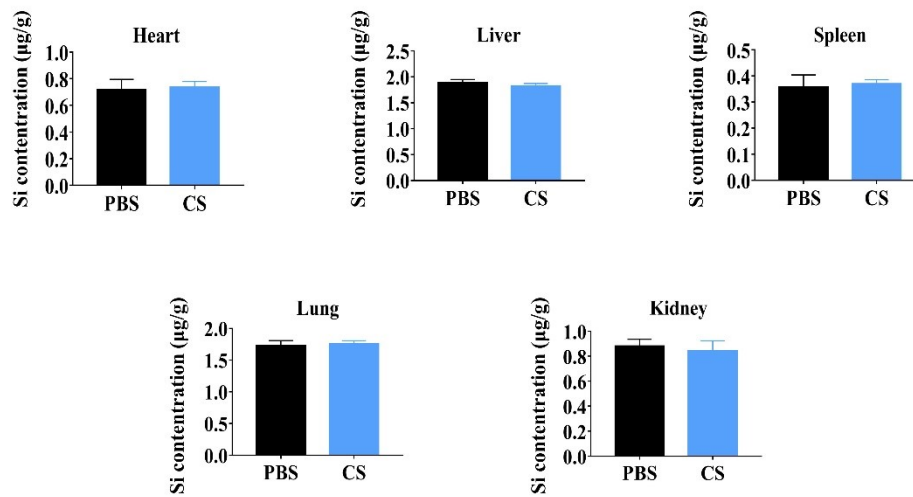

Figure.S6. Distribution of silicon element in different organs including heart, liver, spleen, lung and kidney of mice after CS ion solution treatment for 1 month.

Table S1. Primer Sequences.

| Gene          | Forward sequence (5'-3') | Reverse sequence (5'-3') |
|---------------|--------------------------|--------------------------|
| $\alpha$ -SMA | ATGACCCAGATTATGTTTGAGACC | CCAGAGTCCAGCACAATACCA    |
| IL1- $\beta$  | GCAACTGTTCTGAACTCAACT    | ATCTTTTGGGGTCCGTCAACT    |

|                 |                        |                          |
|-----------------|------------------------|--------------------------|
| TNF- $\alpha$   | CCAAAGGGATGAGAAGTTCC   | CTCCACTTGGTGGTTTGCTA     |
| iNOS            | GAGGCCCAGGAGGAGAGAGTCC | TCCATGCAGACAACCTTGGTGTTG |
| IL-6            | AGTTGCCTTCTTGGGACTGA   | TCCACGATTTCCCAGAGAAC     |
| Arg-1           | AGACCACAGTCTGGCAGTTG   | CCACCCAAATGACACATAGG     |
| CD206           | TGATTACGAGCAGTGGAAGC   | G TTCACCGTAAGCCCAATTT    |
| CD301           | ACTGAGTTCCTGCCTCTGGT   | ATCTGGGACCAAGGAGAGTG     |
| Fibronectin     | GCCTGAGGTGGACCCCGCTA   | GGGCCCAAGTGACCCGCATC     |
| Coll $\alpha$ 1 | CGCCATCAAGGTCTACTG     | ACGGGAATCCATCGGTC        |
| TGF- $\beta$    | CCCTATATTTGGAGCCTGGA   | CTTGCGACCCACGTAGTAGA     |
| GAPDH           | GGTCGGTGTGAACGGATTTG   | TGTAGACCATGTAGTTGAGGTCA  |

Table S2. Concentrations of Ca<sup>2+</sup> and SiO<sub>3</sub><sup>2-</sup> ions in CS solutions.

|                     | Ca <sup>2+</sup> ( $\mu$ g/mL) | SiO <sub>3</sub> <sup>2-</sup> ( $\mu$ g/mL) |
|---------------------|--------------------------------|----------------------------------------------|
| PBS                 | 0.06 $\pm$ 0.01                | 0.02 $\pm$ 0.00                              |
| CS in PBS solution  | 0.05 $\pm$ 0.03                | 119.2 $\pm$ 0.74                             |
| DMEM                | 59.33 $\pm$ 0.87               | 0.12 $\pm$ 0.04                              |
| CS in DMEM solution | 5.2 $\pm$ 0.05                 | 121.2 $\pm$ 0.69                             |
